# Supplementary material
Source: Springer Nature journal article supplement (https://www.springermedizin.de/resource/supplementary/12905_2012_284_MOESM1_ESM.pdf/9518368)
Supplement: MOESM1 [file 9518368]

Asymptomatic subfertile women with normal TVS  
(N= 700)

Clinics performing hysteroscopy only  
(20 clinics)

Clinics performing SIS and hysteroscopy  
(5 clinics)

N= 380

N= 320

Randomisation

Randomisation

Additional test  
(N= 190)

Standard work-up  
(N= 190)

Additional tests  
(N= 160)

Standard work-up  
(N= 160)

Hysteroscopy

SIS and  
Hysteroscopy

IVF/ICSI (maximum of 3 cycles)

Inclusion

18 months
